# Supplementary material
Source: PubMed Central journal article supplement (PMC4834704)

### Percent Change in Femoral Neck Trabecular Bone Density

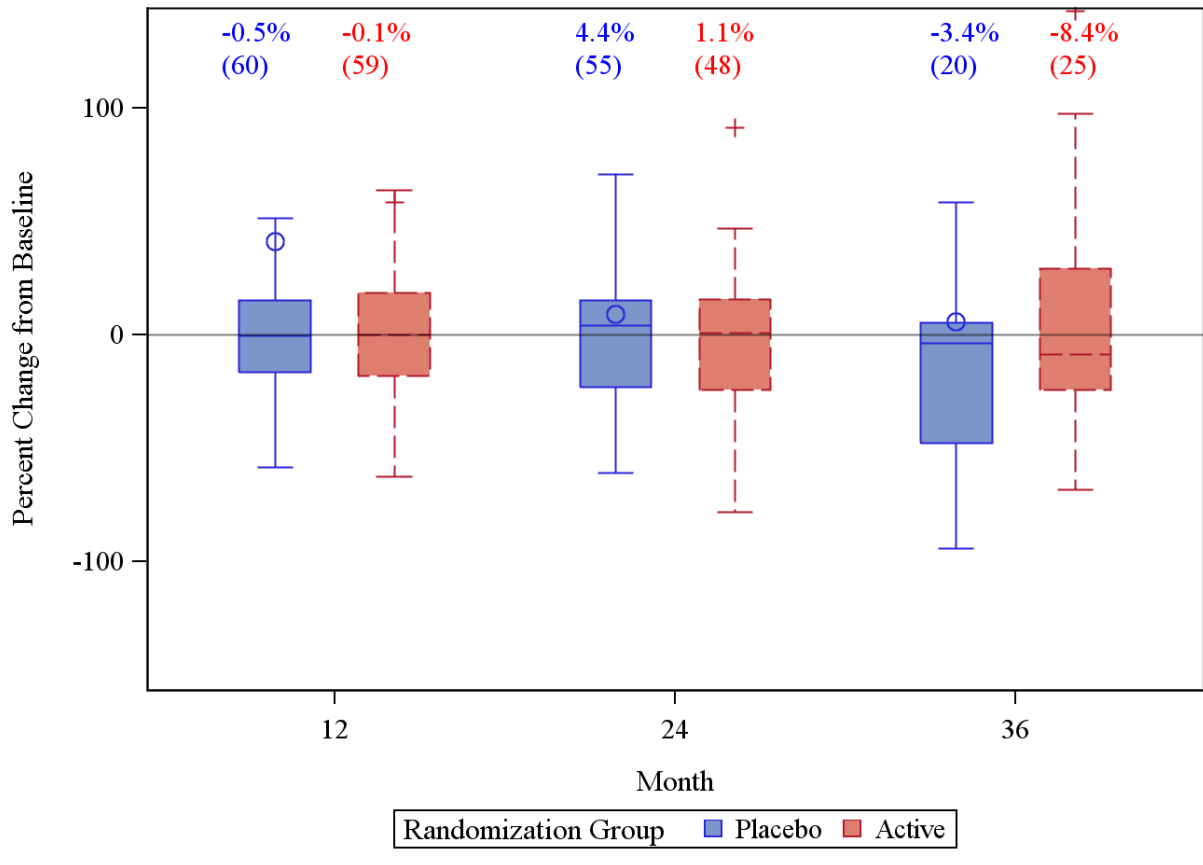

Supplementary Figure 2

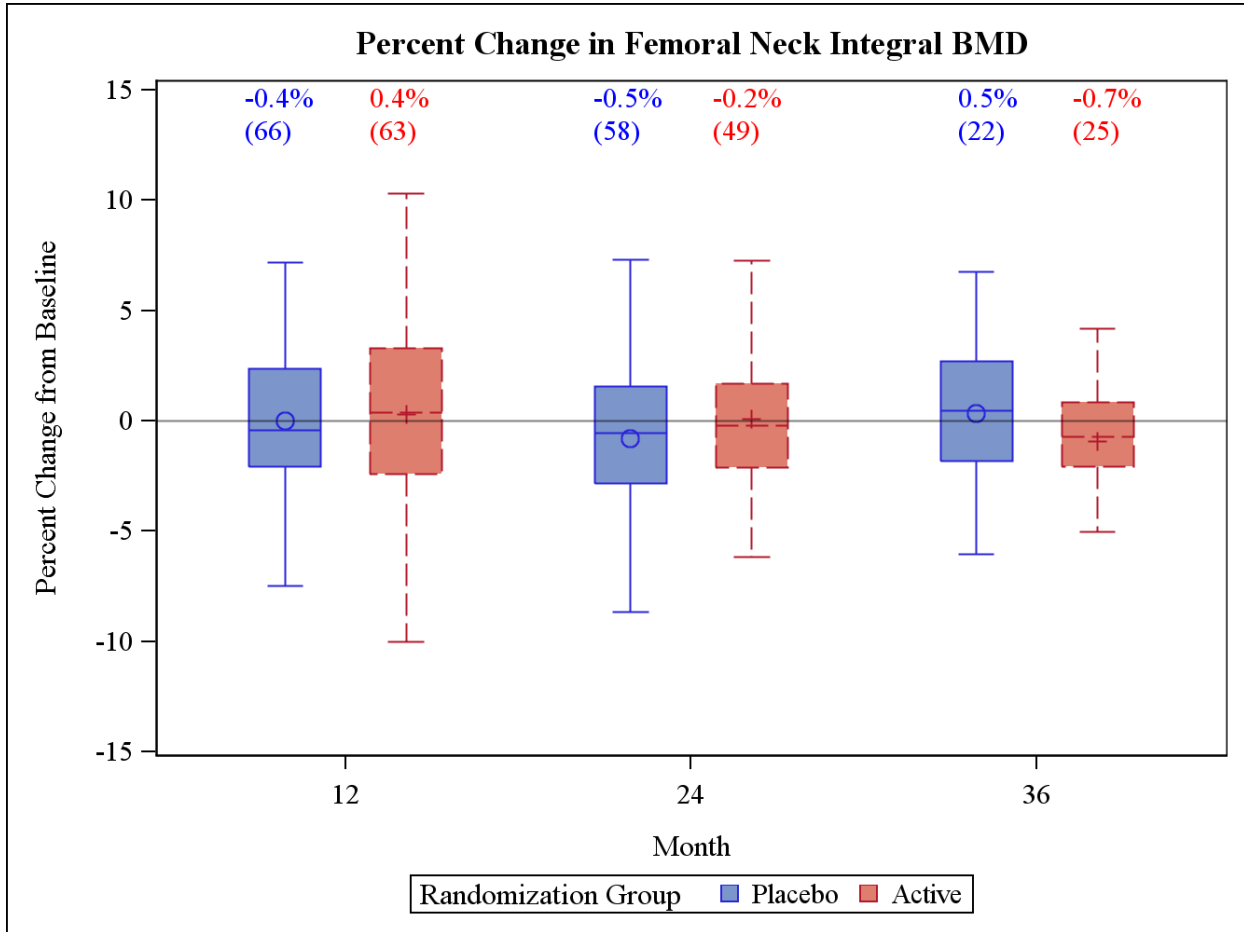

Supplementary Figure 3

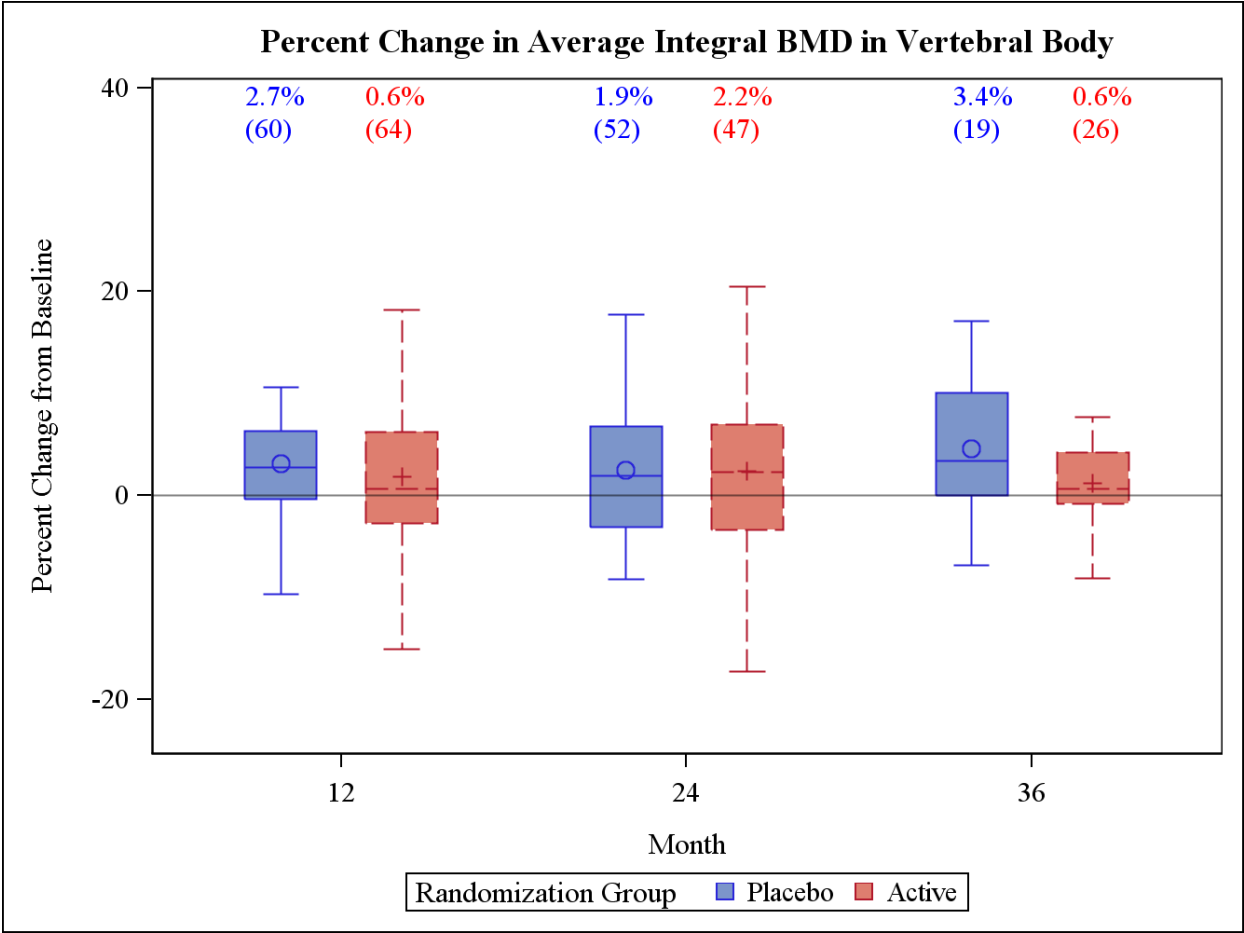

Supplementary Figure 4

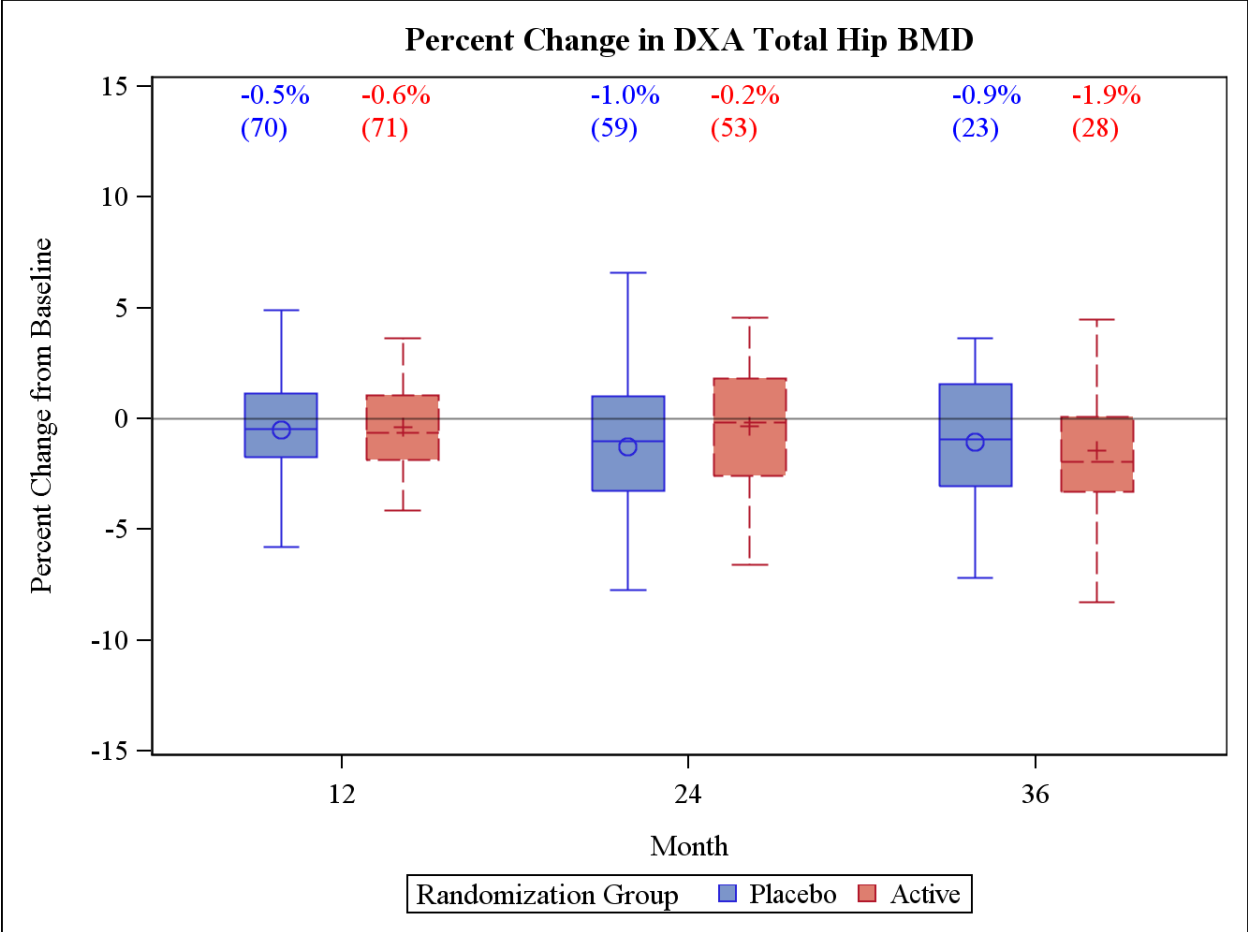

Supplementary Figure 5

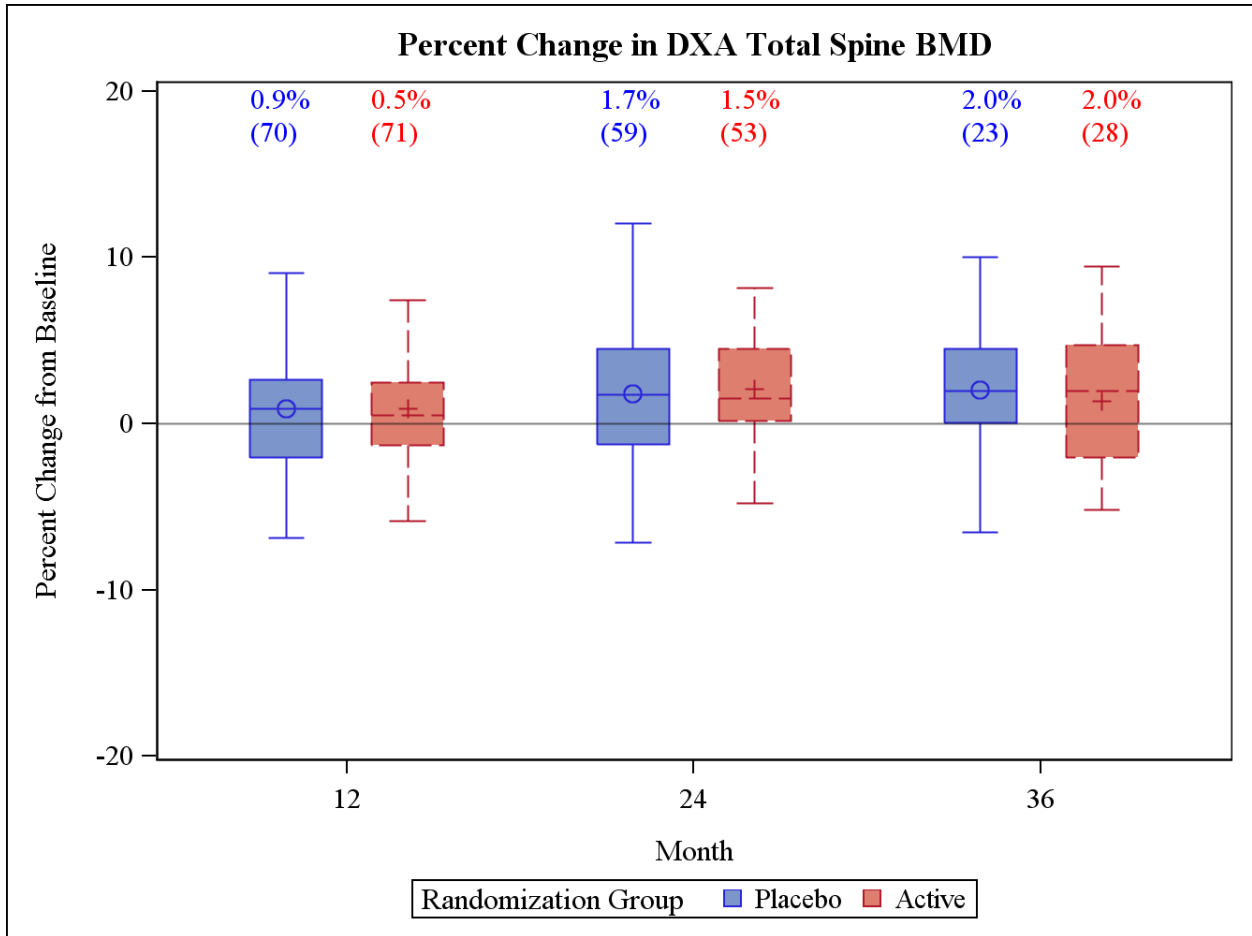

Supplement: NIHMS775206-supplement-Supp_Fig_S1-S5.pdf [file NIHMS775206-supplement-Supp_Fig_S1-S5.pdf]
